# Supplementary figures and images for: Annexin A6 mediates calcium-dependent exosome secretion during plasma membrane repair
Source: eLife journal article supplement (doi:10.7554/elife.86556), 2023-05-19

Figure 2 - Source Data

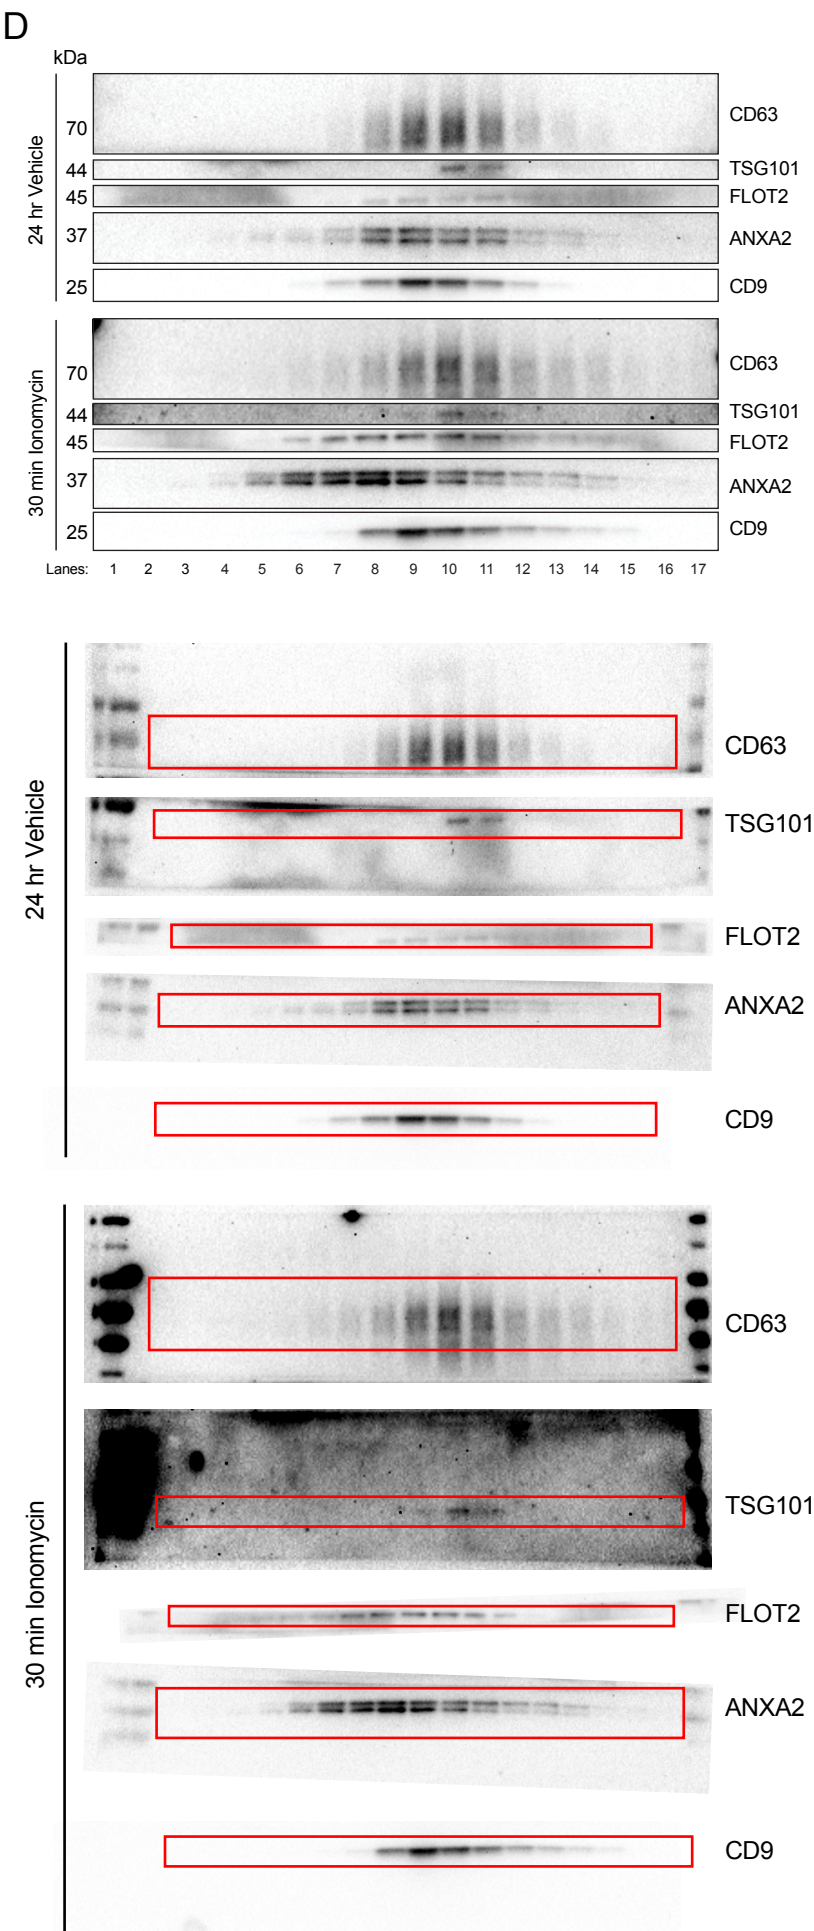

Supplement: fig2-data1 [file elife-86556-fig2-data1-v2.zip]

Figure 3 - Source Data 1

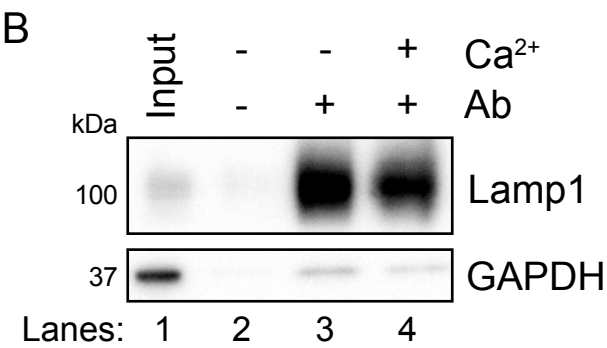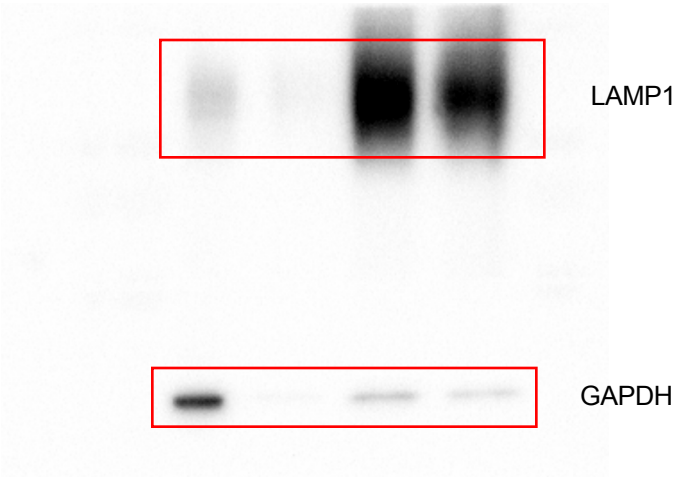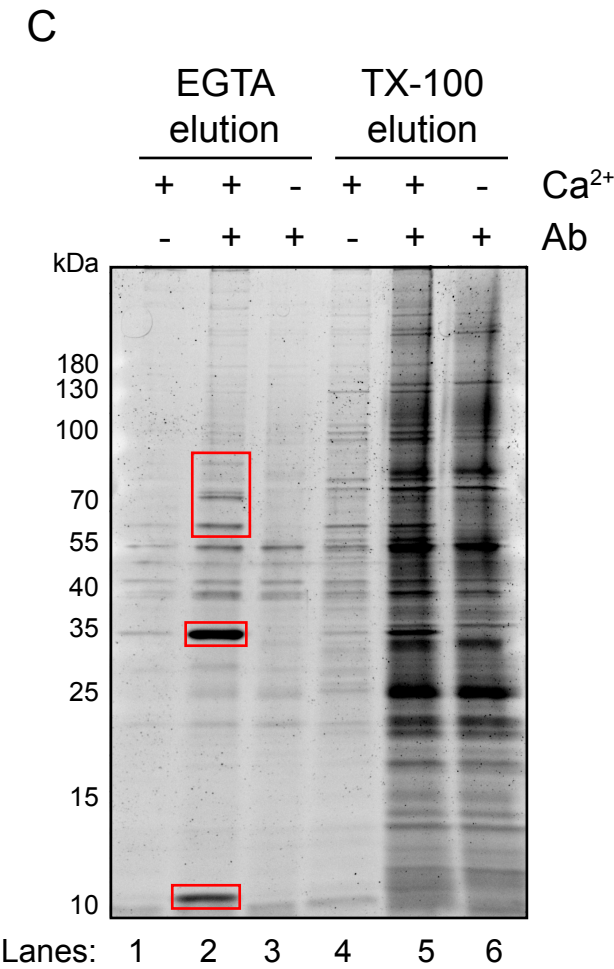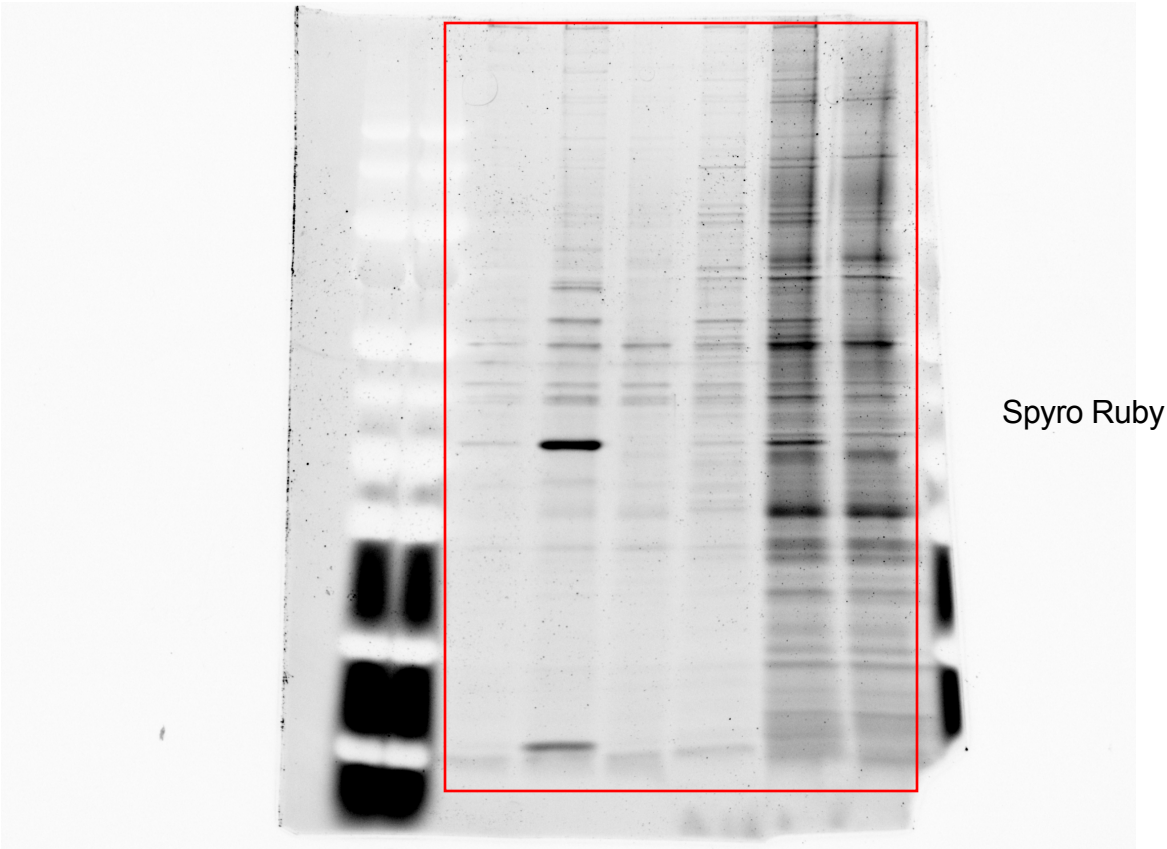

Supplement: fig3-data1 [file Figure 3 - Source Data 1.pdf › Source Data - Figure 3/Figure 3 - Source Data 1.pdf]

Figure 4 - Source Data

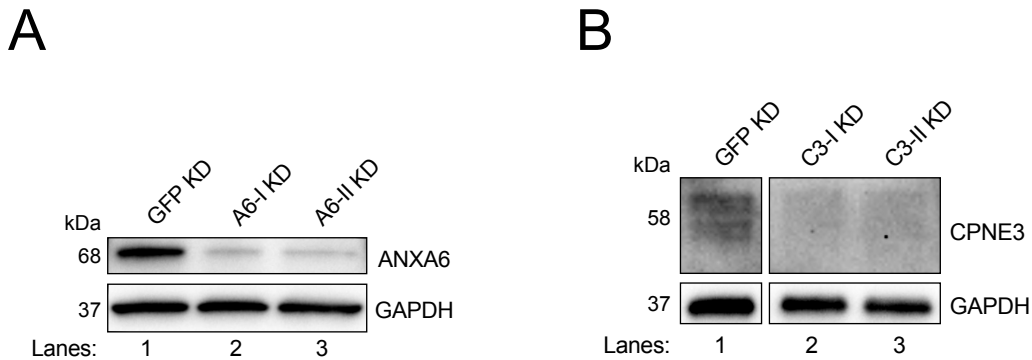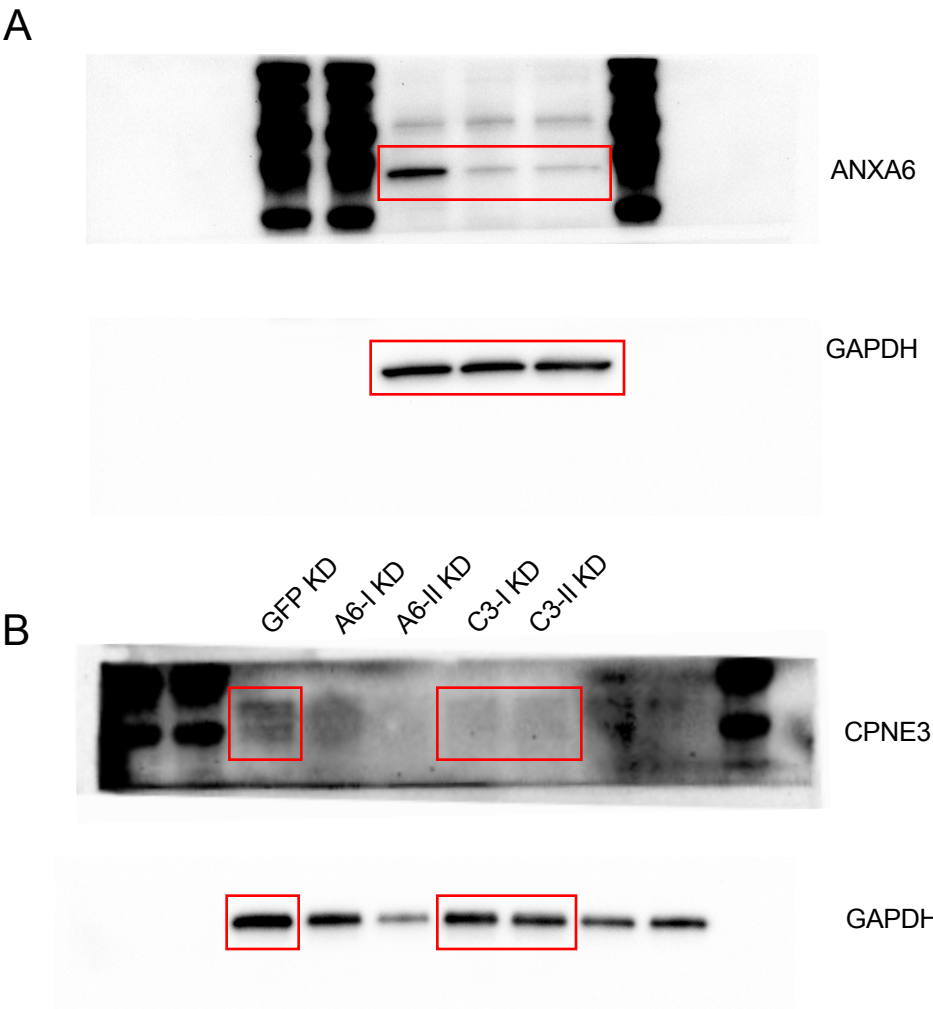

Supplement: fig4-data1 [file elife-86556-fig4-data1-v2.zip]

Figure 4 - Figure supplement 1 - Source Data

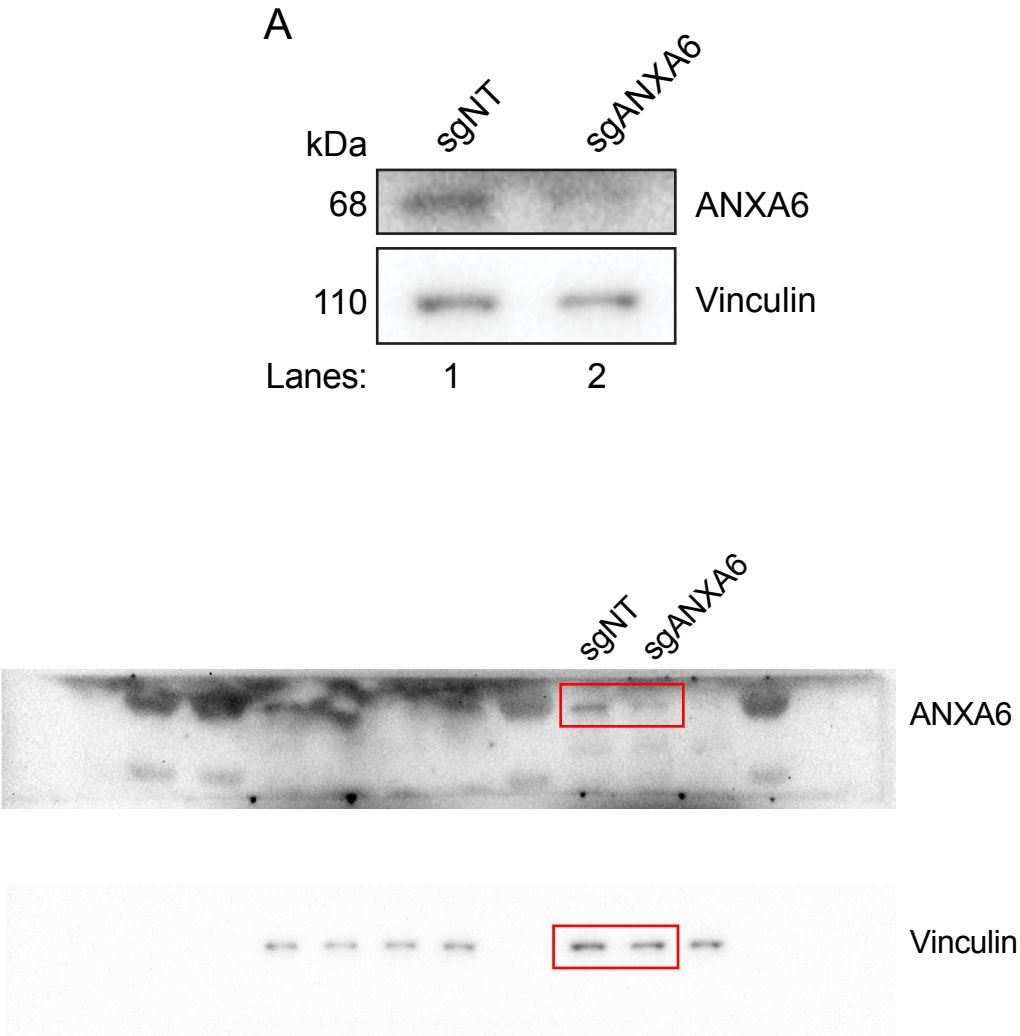

Supplement: fig4-figsupp1-data1 [file elife-86556-fig4-figsupp1-data1-v2.zip]
